# Supplementary material for: Temporal Trends of Emergency Department Visits of Patients with Atrial Fibrillation: A Nationwide Population-Based Study
Source: PubMed Central journal article supplement (PMC7290994; doi:10.3390/jcm9051485), 2020-05-14
Supplement: jcm-09-01485-s001.pdf [file jcm-09-01485-s001.pdf]

## Supplementary Materials

# Temporal trends of emergency department visits of patients with atrial fibrillation: a nationwide population-based study

### Supplementary Tables

Table S1. Definitions of covariates and clinical outcomes

Table S2. Baseline characteristics of the total AF population in Korea

Table S3. The annual number of patients visited ED, number of total ED visits, and clinical outcome including subsequent hospitalization, 30-day, and 90-day mortality after ED visit

Table S4. Comparison of baseline characteristics between patients who visited or did not visit ED in 2017

Table S5. Number of patients who visited the ED from AF-related complications from 2006 to 2017

**Table S1. Definitions of covariates and AF-related complications**

| <b>Diagnosis</b>                                                     | <b>ICD-10-CM codes</b>                                                                                                                                                                                                                                                                        |
|----------------------------------------------------------------------|-----------------------------------------------------------------------------------------------------------------------------------------------------------------------------------------------------------------------------------------------------------------------------------------------|
| AF                                                                   | I48.0-I48.4, I48.9                                                                                                                                                                                                                                                                            |
| Valvular atrial fibrillation (EHRA type 1 VHD)                       | I05.0, I05.2, I05.9, Z95.2-Z95.4 with AF diagnosis                                                                                                                                                                                                                                            |
| Hypertension                                                         | I10-I13, I15; and minimum 1 prescription of anti-hypertensive drug (thiazide, loop diuretics, aldosterone antagonist, alpha-/beta-blocker, calcium-channel blocker, angiotensin-converting enzyme inhibitor, angiotensin II receptor blocker).                                                |
| Diabetes mellitus                                                    | E11-E14; and minimum 1 prescription of anti-diabetic drugs (sulfonylureas, metformin, meglitinides, thiazolidinediones, dipeptidyl peptidase-4 inhibitors, $\alpha$ -glucosidase inhibitors, and insulin).                                                                                    |
| Dyslipidemia                                                         | E78                                                                                                                                                                                                                                                                                           |
| Heart Failure                                                        | I50                                                                                                                                                                                                                                                                                           |
| Stroke/TIA/TE                                                        | I63, I64, G458, G459, I74                                                                                                                                                                                                                                                                     |
| Myocardial infarction                                                | I21, I22                                                                                                                                                                                                                                                                                      |
| Peripheral artery disease                                            | I70, I73                                                                                                                                                                                                                                                                                      |
| VHD (EHRA type 2)                                                    | I34.0-I34.2 (mitral valve disease), I35.0-I35.2, I06.0-I06.2 (aortic valve disease), I36.0-I36.2, I07.0-I07.2 (tricuspid valve disease) and I37.0-I37.2 (pulmonic valve disease)                                                                                                              |
| Cancer                                                               | C00-97 and RID code (V193)                                                                                                                                                                                                                                                                    |
| Chronic obstructive pulmonary disease                                | J41-J44                                                                                                                                                                                                                                                                                       |
| Chronic kidney disease                                               | N18, N19                                                                                                                                                                                                                                                                                      |
| Hemodialysis                                                         | Procedure code: O7011-O7020                                                                                                                                                                                                                                                                   |
| Peritoneal dialysis                                                  | Procedure code: O7017, O7075                                                                                                                                                                                                                                                                  |
| Percutaneous coronary intervention                                   | Procedure code: M6561, M6562, M6563, M6564                                                                                                                                                                                                                                                    |
| CHA <sub>2</sub> DS <sub>2</sub> -VASc score                         | Heart failure (1 point), hypertension (1 point), age $\geq$ 75 years (2 points), diabetes mellitus (1 point), previous stroke/TIA/TE (2 points), vascular disease (prior myocardial infarction or peripheral artery disease, 1 point), age $\geq$ 65 years (1 point) and female sex (1 point) |
| <b>AF-related complications (as a primary diagnosis of ED visit)</b> |                                                                                                                                                                                                                                                                                               |
| Ischemic stroke                                                      | I63, I64                                                                                                                                                                                                                                                                                      |
| Atrial fibrillation                                                  | I48.0-I48.4, I48.9                                                                                                                                                                                                                                                                            |
| Heart failure                                                        | I50                                                                                                                                                                                                                                                                                           |
| Myocardial infarction                                                | I21, I22                                                                                                                                                                                                                                                                                      |
| Intracranial hemorrhage                                              | I60-62                                                                                                                                                                                                                                                                                        |

Gastrointestinal bleeding

I85, K22.1, K22.8, K25.0, K25.2, K25.4, K25.6, K26.0, K26.2, K26.4, K26.6, K27.0, K27.2, K27.4, K27.6, K28.0, K28.2, K28.4, K28.6, K29.0, K31.8, K55.2, K57.0, K57.1, K57.2, K57.3, K57.4, K57.5, K57.8, K57.9, K62.5, K66.1, K92.0, K92.1, K92.2

Other major bleeding

D62 (posthemorrhagic anemia), H05.2 (hemorrhage of orbit), H35.6 (retinal hemorrhage), H43.1 (vitreous hemorrhage), J94.2 (hemothorax), M25.0 (hemarthrosis), R04 (hemorrhage from respiratory passages; epistaxis, hemorrhage from throat, hemoptysis, or other sites/unspecified sites from respiratory passages)

---

Abbreviation: AF, atrial fibrillation; ED, emergency department; EHRA, European Heart Rhythm Association; RID, Rare Intractable Disease program; VHD, valvular heart disease.

**Table S2. Baseline characteristics of the total AF population in Korea**

|                                                 | 2006    | 2007    | 2008    | 2009    | 2010    | 2011    | 2012    | 2013    | 2014    | 2015    | 2016    | 2017    | P for trend |
|-------------------------------------------------|---------|---------|---------|---------|---------|---------|---------|---------|---------|---------|---------|---------|-------------|
| <b>Number</b>                                   | 132,548 | 144,842 | 157,368 | 170,953 | 186,147 | 193,346 | 214,900 | 229,947 | 256,790 | 285,713 | 317,017 | 347,709 |             |
| <b>Age</b>                                      |         |         |         |         |         |         |         |         |         |         |         |         |             |
| <b>Mean ± SD</b>                                | 66±13   | 66±13   | 67±13   | 67±13   | 68±13   | 68±13   | 69±13   | 69±13   | 70±13   | 70±13   | 70±12   | 71±12   | <0.001      |
| <b>20-29</b>                                    | 1.5     | 1.4     | 1.2     | 1.0     | 0.9     | 0.8     | 0.7     | 0.6     | 0.6     | 0.6     | 0.6     | 0.5     | <0.001      |
| <b>30-39</b>                                    | 3.1     | 2.9     | 2.6     | 2.4     | 2.2     | 2.0     | 1.8     | 1.6     | 1.5     | 1.5     | 1.3     | 1.2     | <0.001      |
| <b>40-49</b>                                    | 8.0     | 7.7     | 7.0     | 6.5     | 6.0     | 5.5     | 5.1     | 4.7     | 4.5     | 4.4     | 4.2     | 3.9     | <0.001      |
| <b>50-59</b>                                    | 15.6    | 15.2    | 15.0    | 14.7    | 14.7    | 14.9    | 14.6    | 14.2    | 13.7    | 13.1    | 12.6    | 12.1    | <0.001      |
| <b>60-69</b>                                    | 28.1    | 27.4    | 26.9    | 26.3    | 25.4    | 24.4    | 23.5    | 23.0    | 22.9    | 23.2    | 23.3    | 22.9    | <0.001      |
| <b>70-79</b>                                    | 30.3    | 31.2    | 32.1    | 32.8    | 33.3    | 34.1    | 35.0    | 35.6    | 35.1    | 34.2    | 33.7    | 33.6    | <0.001      |
| <b>80-</b>                                      | 13.5    | 14.4    | 15.3    | 16.4    | 17.6    | 18.2    | 19.3    | 20.4    | 21.7    | 23.0    | 24.4    | 25.9    | <0.001      |
| <b>Sex (male)</b>                               | 54.5    | 54.9    | 55.2    | 55.3    | 55.9    | 56.2    | 56.6    | 57.1    | 57.4    | 57.4    | 57.3    | 57.5    | <0.001      |
| <b>Comorbidities</b>                            |         |         |         |         |         |         |         |         |         |         |         |         |             |
| <b>Hypertension</b>                             | 76.2    | 75.9    | 76.4    | 77.1    | 77.6    | 74.5    | 78.7    | 80.7    | 80.3    | 79.8    | 79.7    | 79.6    | <0.001      |
| <b>Diabetes mellitus</b>                        | 21.6    | 22.0    | 22.6    | 23.3    | 23.8    | 24.0    | 24.6    | 25.2    | 25.5    | 25.7    | 26.2    | 26.8    | <0.001      |
| <b>Heart failure</b>                            | 24.1    | 23.5    | 22.6    | 22.0    | 21.9    | 22.8    | 23.3    | 25.0    | 26.1    | 28.9    | 31.0    | 33.9    | <0.001      |
| <b>Stroke/TIA/TE</b>                            | 17.2    | 17.7    | 18.3    | 19.2    | 19.8    | 19.6    | 20.2    | 21.1    | 20.9    | 21.0    | 21.2    | 21.1    | <0.001      |
| <b>Myocardial infarction</b>                    | 5.5     | 5.2     | 5.1     | 5.0     | 4.7     | 4.2     | 3.6     | 3.6     | 3.6     | 3.8     | 4.0     | 4.2     | <0.001      |
| <b>Peripheral artery disease</b>                | 10.5    | 12.3    | 15.1    | 17.9    | 18.5    | 18.1    | 17.2    | 17.5    | 17.6    | 18.6    | 19.5    | 19.9    | <0.001      |
| <b>VHD (EHRA type 2)</b>                        | 5.6     | 5.0     | 4.9     | 4.7     | 4.6     | 4.7     | 4.8     | 4.8     | 4.6     | 4.5     | 4.3     | 4.1     | <0.001      |
| <b>Cancer</b>                                   | 5.7     | 6.4     | 6.6     | 7.0     | 7.2     | 7.4     | 7.0     | 6.7     | 6.8     | 6.8     | 6.9     | 7.0     | <0.001      |
| <b>COPD</b>                                     | 19.5    | 20.2    | 20.2    | 20.0    | 19.9    | 19.8    | 19.8    | 19.7    | 18.5    | 19.0    | 18.7    | 18.8    | <0.001      |
| <b>Chronic kidney disease</b>                   | 2.9     | 3.1     | 3.3     | 3.6     | 3.8     | 4.0     | 4.6     | 5.1     | 5.5     | 5.8     | 6.3     | 6.9     | <0.001      |
| <b>Hemodialysis</b>                             | 0.9     | 0.9     | 1.0     | 1.0     | 1.1     | 1.1     | 1.3     | 1.3     | 1.4     | 1.4     | 1.5     | 1.6     | <0.001      |
| <b>Peritoneal dialysis</b>                      | 0.2     | 0.2     | 0.2     | 0.2     | 0.2     | 0.2     | 0.2     | 0.2     | 0.1     | 0.2     | 0.2     | 0.1     | <0.001      |
| <b>Previous PCI</b>                             | 1.5     | 1.7     | 1.9     | 2.1     | 2.0     | 2.0     | 2.1     | 2.2     | 2.2     | 2.2     | 2.1     | 2.1     | <0.001      |
| <b>CHA<sub>2</sub>DS<sub>2</sub>-VASc score</b> |         |         |         |         |         |         |         |         |         |         |         |         |             |
| <b>Mean ± SD</b>                                | 2.9±1.6 | 2.9±1.6 | 3±1.6   | 3±1.6   | 3.1±1.6 | 3.1±1.7 | 3.1±1.6 | 3.2±1.6 | 3.3±1.6 | 3.3±1.6 | 3.4±1.7 | 3.4±1.7 | <0.001      |
| <b>0, 1</b>                                     | 22.2    | 21.7    | 20.6    | 19.8    | 19.3    | 20.1    | 18.4    | 16.7    | 16.2    | 15.6    | 14.8    | 13.7    | <0.001      |
| <b>≥2</b>                                       | 77.8    | 78.3    | 79.4    | 80.2    | 80.7    | 79.9    | 81.6    | 83.3    | 83.8    | 84.4    | 85.2    | 86.3    | <0.001      |
| <b>Medication</b>                               |         |         |         |         |         |         |         |         |         |         |         |         |             |
| <b>Antithrombotic therapy</b>                   |         |         |         |         |         |         |         |         |         |         |         |         |             |
| <b>No therapy</b>                               | 24.1    | 22.8    | 21.0    | 20.2    | 19.2    | 18.3    | 17.0    | 15.5    | 15.6    | 16.0    | 15.3    | 14.9    | <0.001      |
| <b>Antiplatelet agent</b>                       | 46.8    | 47.4    | 49.0    | 49.3    | 49.6    | 48.7    | 48.6    | 47.2    | 46.3    | 40.6    | 35.0    | 30.1    | <0.001      |
| <b>Oral Anticoagulants</b>                      | 29.1    | 29.8    | 30.0    | 30.5    | 31.2    | 33.0    | 34.4    | 37.3    | 38.1    | 43.4    | 49.7    | 55.0    | <0.001      |

|                             |      |      |      |      |      |      |      |      |      |      |      |      |        |
|-----------------------------|------|------|------|------|------|------|------|------|------|------|------|------|--------|
| <b>Warfarin</b>             | 29.1 | 29.8 | 30.0 | 30.5 | 31.1 | 32.8 | 34.1 | 33.5 | 34.9 | 22.7 | 15.4 | 11.4 | <0.001 |
| <b>NOAC</b>                 | 0    | 0    | 0    | 0    | 0.1  | 0.2  | 0.3  | 3.8  | 3.2  | 20.7 | 34.3 | 43.6 | <0.001 |
| <b>Antiarrhythmic drugs</b> |      |      |      |      |      |      |      |      |      |      |      |      |        |
| <b>Class Ic</b>             | 7.2  | 7.6  | 8.3  | 8.9  | 9.9  | 11.3 | 12.0 | 12.9 | 13.5 | 13.7 | 14.4 | 15.2 | <0.001 |
| <b>Class III</b>            | 10.1 | 10.3 | 10.5 | 10.7 | 10.8 | 11.1 | 11.2 | 11.6 | 12.3 | 12.4 | 12.5 | 13.1 | <0.001 |
| <b>Digoxin</b>              | 41.2 | 38.6 | 36.5 | 34.6 | 32.4 | 31.2 | 29.5 | 27.5 | 25.8 | 23.8 | 21.7 | 20.0 | <0.001 |
| <b>Beta-blocker</b>         | 36.0 | 36.2 | 36.7 | 37.0 | 38.2 | 39.9 | 40.7 | 40.7 | 40.8 | 41.3 | 42.5 | 43.1 | <0.001 |
| <b>Non-DHP CCB</b>          | 19.2 | 19.2 | 19.6 | 19.8 | 20.1 | 20.2 | 19.7 | 19.4 | 18.7 | 18.2 | 17.9 | 17.2 | <0.001 |
| <b>DHP CCB</b>              | 26.4 | 24.2 | 21.9 | 18.7 | 16.4 | 14.1 | 12.6 | 11.5 | 10.5 | 9.5  | 8.7  | 7.9  | <0.001 |
| <b>ACE inhibitor</b>        | 38.7 | 41.0 | 43.5 | 46.5 | 48.1 | 49.0 | 49.8 | 50.7 | 49.9 | 49.4 | 49.8 | 49.9 | <0.001 |
| <b>ARB</b>                  | 34.6 | 35.3 | 35.0 | 33.8 | 32.8 | 31.5 | 30.3 | 29.1 | 27.8 | 26.8 | 26.5 | 26.3 | <0.001 |
| <b>Diuretics</b>            | 58.5 | 56.4 | 54.8 | 53.4 | 52.2 | 50.5 | 49.3 | 48.5 | 47.1 | 46.3 | 46.2 | 45.9 | <0.001 |
| <b>Statin</b>               | 23.8 | 26.5 | 28.3 | 31.6 | 34.3 | 36.1 | 39.0 | 42.0 | 45.1 | 47.0 | 49.1 | 50.7 | <0.001 |

Abbreviation: ACE, angiotensin-converting enzyme; ARB, angiotensin II receptor blocker; CCB, calcium-channel blocker; COPD, chronic obstructive pulmonary disease; DAPT, dual antiplatelet therapy; DHP, dihydropyridine; EHRA, European Heart Rhythm Association; NOAC, non-vitamin K antagonist oral anticoagulant; PCI, percutaneous coronary intervention; SD, standard deviation; TE, thromboembolism; TIA, transient ischemic attack; VHD, valvular heart disease.

**Table S3. The annual number of patients visited ED, number of total ED visits, and clinical outcome including subsequent hospitalization, 30-day, and 90-day mortality after ED visit**

|                                                                           | 2006    | 2007    | 2008    | 2009    | 2010    | 2011    | 2012    | 2013    | 2014    | 2015    | 2016    | 2017    |
|---------------------------------------------------------------------------|---------|---------|---------|---------|---------|---------|---------|---------|---------|---------|---------|---------|
| <b>Total AF patients</b>                                                  | 132,548 | 144,842 | 157,368 | 170,953 | 186,147 | 193,346 | 214,900 | 229,947 | 256,790 | 285,713 | 317,017 | 347,709 |
| <b>Number of patients who visited ED <math>\geq</math>1 in index year</b> | 40,425  | 44,576  | 47,975  | 52,648  | 57,754  | 59,914  | 67,011  | 70,376  | 79,188  | 87,077  | 99,306  | 99,763  |
| <b>% of patients with <math>\geq</math>1 ED visit in index year</b>       | 30.5%   | 30.8%   | 30.5%   | 30.8%   | 31.0%   | 31.0%   | 31.2%   | 30.6%   | 30.8%   | 30.5%   | 31.3%   | 28.7%   |
| <b>Number of total ED visits of NVAF patients</b>                         | 62,781  | 69,781  | 75,806  | 83,721  | 93,102  | 97,903  | 111,101 | 116,102 | 130,441 | 144,724 | 169,678 | 159,004 |
| <b>Subsequent hospitalization after ED visit</b>                          | 46,024  | 49,907  | 53,376  | 57,724  | 63,882  | 65,667  | 73,283  | 75,779  | 84,798  | 95,917  | 126,727 | 119,432 |
| <b>% of subsequent hospitalization after ED visit in total ED visits</b>  | 73.3%   | 71.5%   | 70.4%   | 68.9%   | 68.6%   | 67.1%   | 66.0%   | 65.3%   | 65.0%   | 66.3%   | 74.7%   | 75.1%   |
| <b>30-day mortality after ED visit</b>                                    | 10.4%   | 10.3%   | 10.0%   | 9.6%    | 9.8%    | 9.6%    | 9.6%    | 8.9%    | 8.8%    | 8.6%    | 8.2%    | 7.6%    |
| <b>90-day mortality after ED visit</b>                                    | 16.3%   | 15.9%   | 15.5%   | 15.1%   | 15.6%   | 15.3%   | 15.1%   | 14.3%   | 14.0%   | 13.8%   | 13.2%   | 12.0%   |

Abbreviation: NVAF, non-valvular atrial fibrillation; ED, emergency department.

**Table S4. Comparison of baseline characteristics between patients who visited or did not visit ED in 2017**

|                                                 | <b>Total</b> | <b>Patients who did not visit ED</b> | <b>Patients who visited ED</b> | <b>p-value</b> |
|-------------------------------------------------|--------------|--------------------------------------|--------------------------------|----------------|
| <b>Number</b>                                   | 347,709      | 247,946                              | 99,763                         |                |
| <b>Age</b>                                      |              |                                      |                                |                |
| <b>Mean ± SD</b>                                | 71±12        | 70±12                                | 73±13                          | <0.001         |
| <b>20-29</b>                                    | 0.5          | 0.5                                  | 0.5                            | <0.001         |
| <b>30-39</b>                                    | 1.2          | 1.2                                  | 1.3                            |                |
| <b>40-49</b>                                    | 3.9          | 4.1                                  | 3.5                            |                |
| <b>50-59</b>                                    | 12.1         | 13.0                                 | 9.6                            |                |
| <b>60-69</b>                                    | 22.9         | 24.9                                 | 18.0                           |                |
| <b>70-79</b>                                    | 33.6         | 34.0                                 | 32.6                           |                |
| <b>80-</b>                                      | 25.9         | 22.4                                 | 34.6                           |                |
| <b>Sex (male)</b>                               | 57.5         | 58.6                                 | 54.8                           | <0.001         |
| <b>Comorbidities</b>                            |              |                                      |                                |                |
| <b>Hypertension</b>                             | 79.6         | 78.1                                 | 83.4                           | <0.001         |
| <b>Diabetes mellitus</b>                        | 26.8         | 24.6                                 | 32.2                           | <0.001         |
| <b>Heart failure</b>                            | 33.9         | 33.5                                 | 35.1                           | <0.001         |
| <b>Stroke/TIA/TE</b>                            | 21.1         | 20.3                                 | 23.0                           | <0.001         |
| <b>Myocardial infarction</b>                    | 4.2          | 3.7                                  | 5.5                            | <0.001         |
| <b>Peripheral artery disease</b>                | 19.9         | 18.9                                 | 22.3                           | <0.001         |
| <b>COPD</b>                                     | 18.8         | 17.0                                 | 23.3                           | <0.001         |
| <b>Chronic kidney disease</b>                   | 6.9          | 5.5                                  | 10.1                           | <0.001         |
| <b>Hemodialysis</b>                             | 1.6          | 1.1                                  | 2.8                            | <0.001         |
| <b>Peritoneal dialysis</b>                      | 0.1          | 0.1                                  | 0.3                            | <0.001         |
| <b>Previous PCI</b>                             | 2.1          | 1.8                                  | 2.7                            | <0.001         |
| <b>CHA<sub>2</sub>DS<sub>2</sub>-VASc score</b> |              |                                      |                                |                |
| <b>Mean ± SD</b>                                | 3.4±1.7      | 3.3±1.6                              | 3.8±1.7                        | <0.001         |
| <b>0, 1</b>                                     | 13.7         | 14.8                                 | 10.8                           | <0.001         |
| <b>≥2</b>                                       | 86.3         | 85.2                                 | 89.2                           |                |
| <b>Medication</b>                               |              |                                      |                                |                |
| <b>Antithrombotic therapy</b>                   |              |                                      |                                | <0.001         |
| <b>No therapy</b>                               | 14.9         | 15.5                                 | 13.7                           |                |
| <b>Antiplatelet agent</b>                       | 30.1         | 31.3                                 | 26.9                           |                |
| <b>Oral Anticoagulants</b>                      | 55.0         | 53.2                                 | 59.5                           |                |
| <b>Warfarin</b>                                 | 11.4         | 12.0                                 | 9.9                            |                |
| <b>NOAC</b>                                     | 43.6         | 41.2                                 | 49.6                           |                |

**Antiarrhythmic drugs**

|                      |      |      |      |        |
|----------------------|------|------|------|--------|
| <b>Class Ic</b>      | 15.2 | 15.7 | 13.8 | <0.001 |
| <b>Class III</b>     | 13.1 | 9.9  | 21.0 | <0.001 |
| <b>Digoxin</b>       | 20.0 | 17.6 | 25.8 | <0.001 |
| <b>Beta-blocker</b>  | 43.1 | 40.8 | 48.8 | <0.001 |
| <b>Non-DHP CCB</b>   | 17.2 | 13.8 | 25.7 | <0.001 |
| <b>DHP CCB</b>       | 7.9  | 6.8  | 10.5 | <0.001 |
| <b>ACE inhibitor</b> | 49.9 | 49.2 | 51.6 | <0.001 |
| <b>ARB</b>           | 26.3 | 22.1 | 36.7 | <0.001 |
| <b>Diuretics</b>     | 45.9 | 39.2 | 62.7 | <0.001 |
| <b>Statin</b>        | 50.7 | 49.3 | 54.2 | <0.001 |

Abbreviation: ACE, angiotensin-converting enzyme; ARB, angiotensin II receptor blocker; CCB, calcium-channel blocker; COPD, chronic obstructive pulmonary disease; DAPT, dual antiplatelet therapy; DHP, dihydropyridine; NOAC, non-vitamin K antagonist oral anticoagulant; PCI, percutaneous coronary intervention; SD, standard deviation; TE, thromboembolism; TIA, transient ischemic attack.

**Table S5. Number and incidence of patients who visited the ED from AF-related complications from 2006 to 2017**

|                             | 2006            | 2007            | 2008            | 2009            | 2010            | 2011            | 2012            | 2013            | 2014            | 2015             | 2016             | 2017             |
|-----------------------------|-----------------|-----------------|-----------------|-----------------|-----------------|-----------------|-----------------|-----------------|-----------------|------------------|------------------|------------------|
| <b>Ischemic stroke</b>      | 5,393<br>(4.07) | 5,829<br>(4.02) | 6,440<br>(4.09) | 6,667<br>(3.90) | 7,513<br>(4.04) | 7,812<br>(4.04) | 8,661<br>(4.03) | 9,006<br>(3.92) | 9,746<br>(3.80) | 10,167<br>(3.56) | 11,395<br>(3.59) | 10,911<br>(3.14) |
| <b>AF</b>                   | 3,948<br>(2.98) | 4,542<br>(3.14) | 5,008<br>(3.18) | 5,539<br>(3.24) | 6,162<br>(3.31) | 7,202<br>(3.72) | 7,895<br>(3.67) | 8,065<br>(3.51) | 9,283<br>(3.62) | 9,675<br>(3.39)  | 11,058<br>(3.49) | 11,256<br>(3.24) |
| <b>HF</b>                   | 2,412<br>(1.82) | 2,693<br>(1.86) | 2,960<br>(1.88) | 3,224<br>(1.89) | 3,671<br>(1.97) | 3,734<br>(1.93) | 4,063<br>(1.89) | 4,315<br>(1.88) | 4,804<br>(1.87) | 5,340<br>(1.87)  | 6,310<br>(1.99)  | 6,216<br>(1.79)  |
| <b>MI</b>                   | 1,967<br>(1.48) | 1,898<br>(1.31) | 1,634<br>(1.04) | 1,510<br>(0.88) | 1,491<br>(0.80) | 1,428<br>(0.74) | 1,401<br>(0.65) | 1,470<br>(0.64) | 1,701<br>(0.66) | 1,796<br>(0.63)  | 2,061<br>(0.65)  | 2,018<br>(0.58)  |
| <b>ICH</b>                  | 1,195<br>(0.90) | 1,154<br>(0.80) | 1,128<br>(0.72) | 1,102<br>(0.64) | 1,202<br>(0.65) | 1,139<br>(0.59) | 1,167<br>(0.54) | 1,139<br>(0.50) | 1,261<br>(0.49) | 1,331<br>(0.47)  | 1,320<br>(0.42)  | 1,243<br>(0.36)  |
| <b>GI bleeding</b>          | 1,056<br>(0.80) | 1,164<br>(0.80) | 1,235<br>(0.78) | 1,362<br>(0.80) | 1,530<br>(0.82) | 1,529<br>(0.79) | 1,750<br>(0.81) | 1,853<br>(0.81) | 2,109<br>(0.82) | 2,296<br>(0.80)  | 2,670<br>(0.84)  | 2,438<br>(0.70)  |
| <b>Other major bleeding</b> | 399<br>(0.30)   | 516<br>(0.36)   | 527<br>(0.33)   | 612<br>(0.36)   | 623<br>(0.33)   | 687<br>(0.36)   | 861<br>(0.40)   | 859<br>(0.37)   | 1,032<br>(0.40) | 1,130<br>(0.40)  | 1,263<br>(0.40)  | 1,197<br>(0.34)  |

Number (%)

The incidence was defined as ED visits from AF-related complications per 100 patients with AF (%).

Abbreviation: AF, atrial fibrillation; GI, gastrointestinal; HF, heart failure; ICH, intracranial hemorrhage; MI, myocardial infarction.
